# Supplementary material for: Red blood cell-like hollow carbon sphere anchored ultrathin Na2Ti3O7 nanosheets as long cycling and high rate-performance anodes for sodium-ion batteries
Source: Royal Society of Chemistry journal article supplement (doi:10.1039/c8ta03799j), 2018-01-01
Supplement: c8ta03799j1.pdf [file c8ta03799j1.pdf]

## Supporting Information

### Red blood cell-like carbon hollow sphere anchored ultrathin $\text{Na}_2\text{Ti}_3\text{O}_7$ nanosheets as long cyclic and high rate-performance anodes for sodium-ion batteries

Sheng Chen, Yuanchao Pang, Jin Liang, Shujiang Ding\*

Department of Applied Chemistry, School of Science, Xi'an Key Laboratory of Sustainable Energy Materials Chemistry. MOE Key Laboratory for Nonequilibrium Synthesis and Modulation of Condensed Matter, State Key Laboratory of electrical insulation and power equipment, Xi'an Jiaotong University, Xi'an 710049, People's Republic of China. E-mail: [dingsj@mail.xjtu.edu.cn](mailto:dingsj@mail.xjtu.edu.cn)

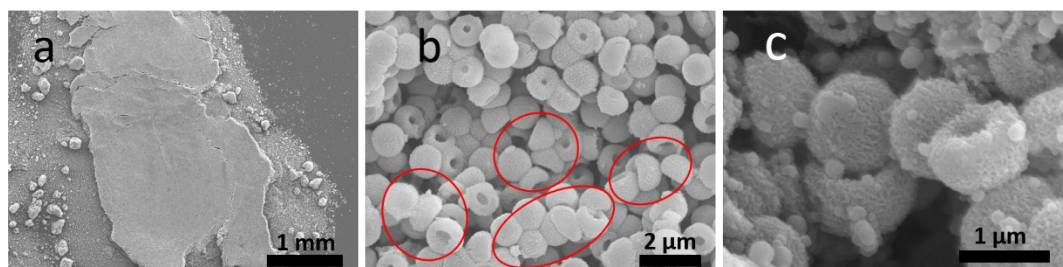

Fig S1 (a) and (b) SEM images of different magnification of  $\text{Na}_2\text{Ti}_3\text{O}_7$ @RHCS powder; (c) Post-mortem SEM image of  $\text{Na}_2\text{Ti}_3\text{O}_7$ @RHCS after 100 cycles

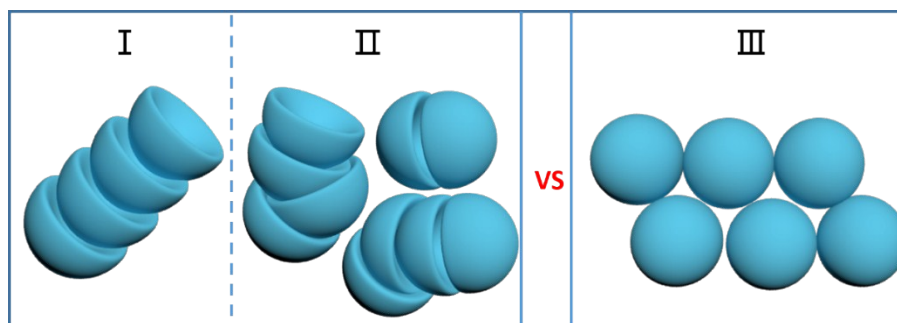

Scheme S1. ( I ) orderly arrangement of RHCS; ( II ) irregularly arrangement of RHCS; ( III ) arrangement of HCS.

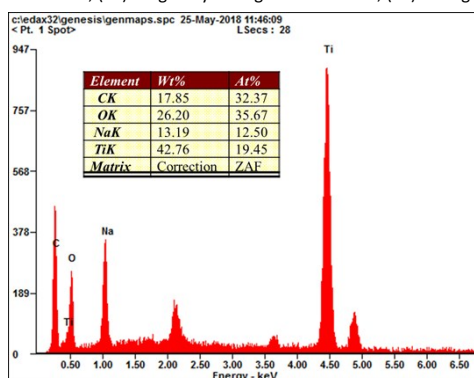

Fig S2 Energy Dispersive Spectrometer (EDS) pattern of  $\text{Na}_2\text{Ti}_3\text{O}_7$ @RHCS; the inserted table is content of C, Na, Ti, and O.

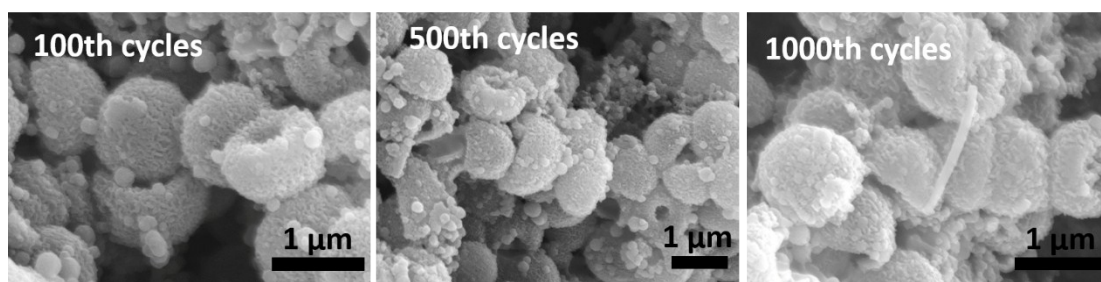

Fig S3 Post-mortem FESEM images of  $\text{Na}_2\text{Ti}_3\text{O}_7@\text{RHCS}$  after 100, 500, 1000 cycles at 10 C.
